# Supplementary material for: An oriented tube array porous carbon anode prepared using a self-blowing mold of salt templates for high-rate potassium storage
Source: Royal Society of Chemistry journal article supplement (doi:10.1039/d3nr06081k), 2024-01-01
Supplement: d3nr06081k1.pdf [file d3nr06081k1.pdf]

## Supplementary Information

### **Oriented tube-array porous carbon anode prepared by self-blowing molding of salt templates for high-rate Potassium Storage**

*Chenchen Shao, Yusheng Luo, Hongguang Fan, Yanpeng Wang, Tao Li, Qingping Li, Wei Liu\**

School of Materials Science and Engineering, Ocean University of China, Qingdao 266100, People's Republic of China. Email: [weiliu@ouc.edu.cn](mailto:weiliu@ouc.edu.cn)  
(W. Liu)

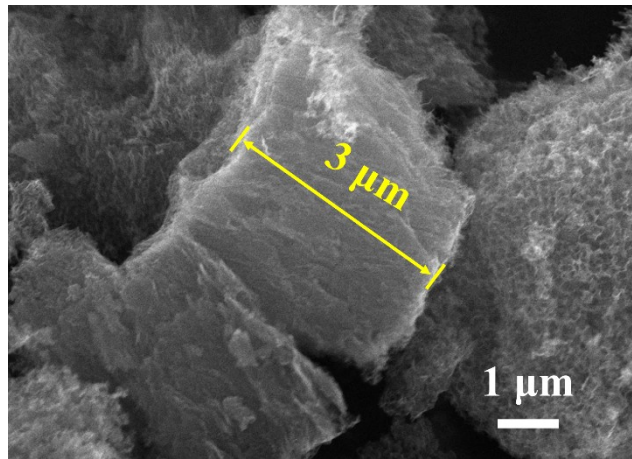

**Figure S1.** SEM images of TAPC samples.

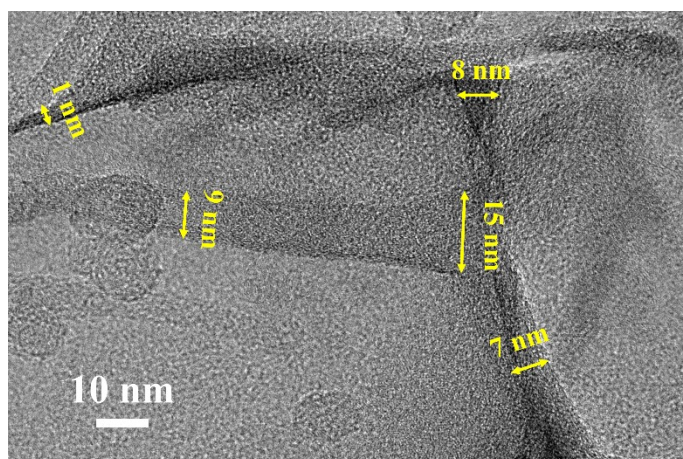

**Figure S2.** HRTEM images of TAPC samples.

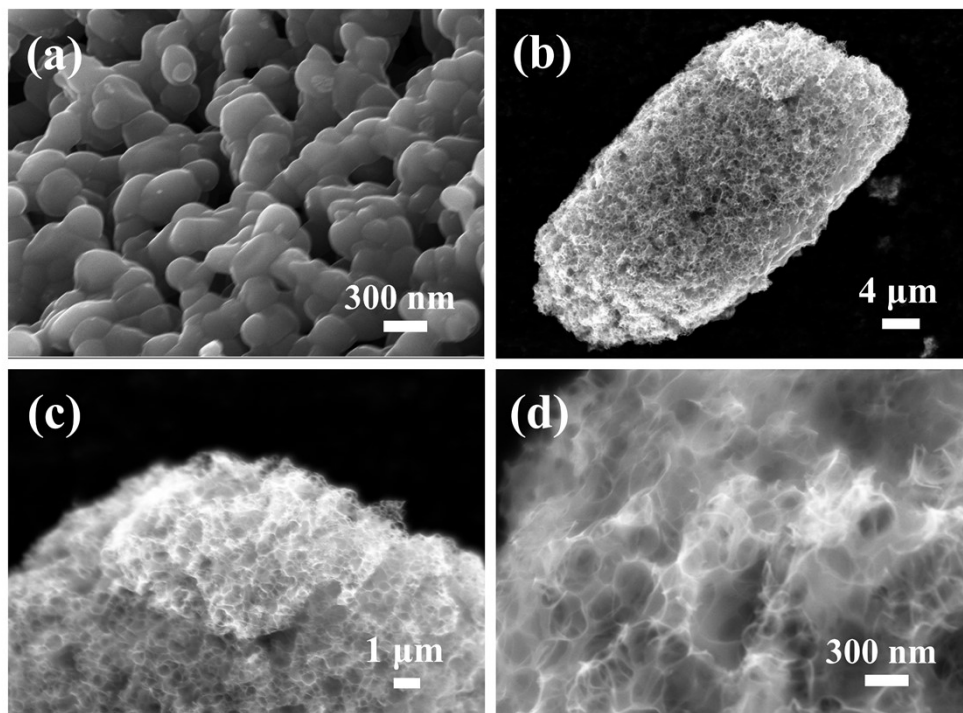

**Figure S3.** (a) SEM image of the  $\text{Na}_2\text{CO}_3$  crystal skeleton obtained from the decomposition of  $\text{NaHCO}_3$  crystal at  $200^\circ\text{C}$ . (b-d) SEM images of SPC samples.

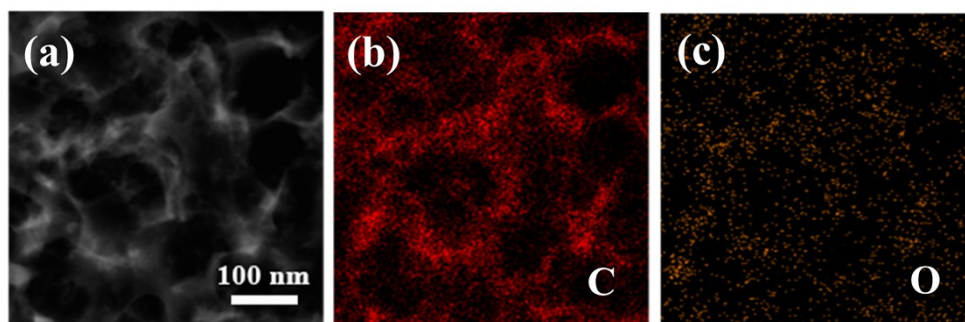

**Figure S4.** (a-c) EDS spectra of TAPC samples.

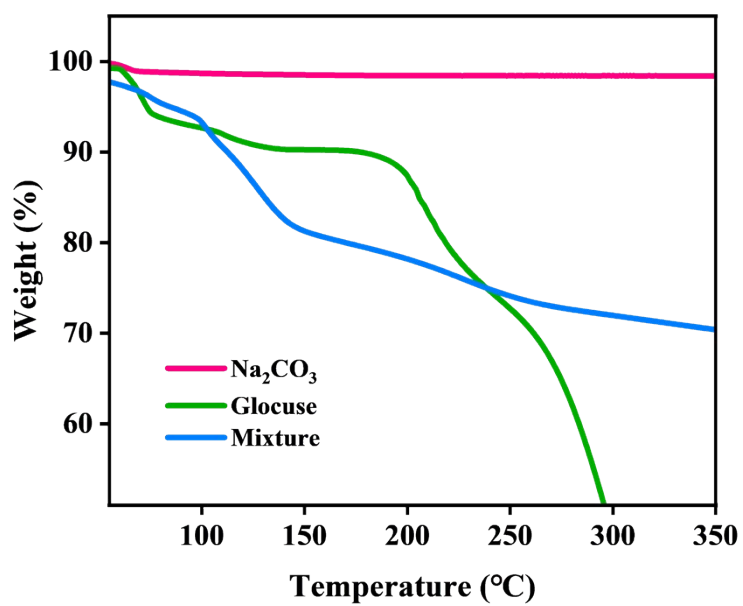

**Figure S5.** The TG curves of raw materials of SPC sample under nitrogen atmosphere.

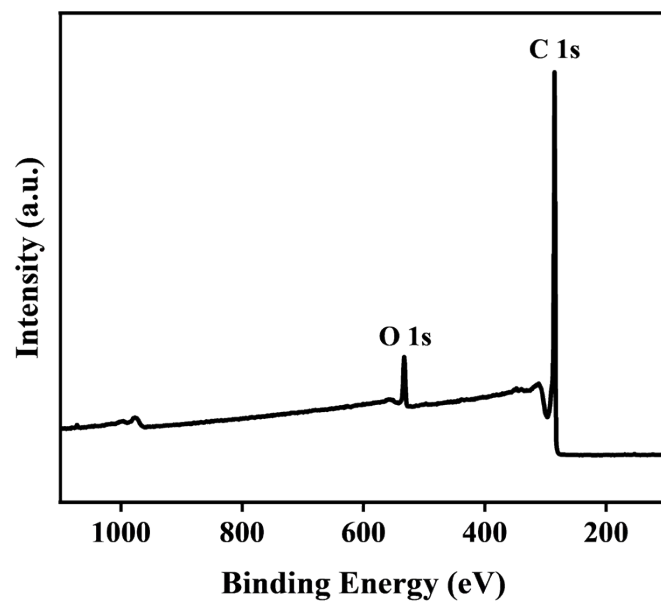

**Figure S6.** The XPS survey spectra of TAPC samples.

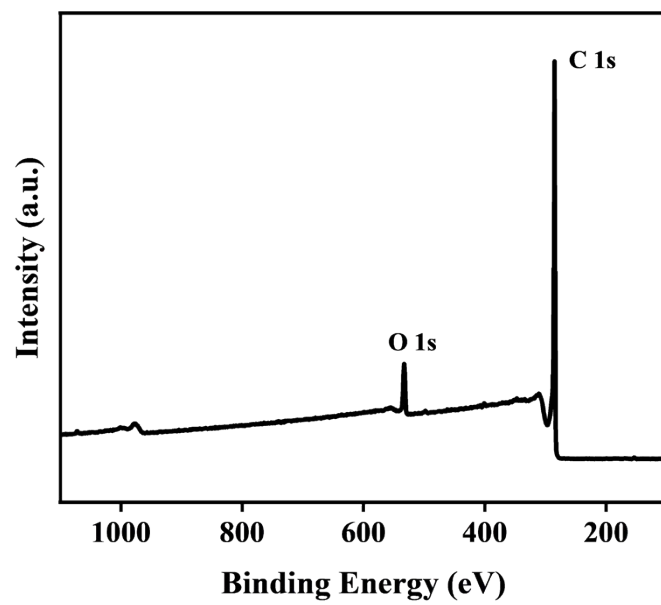

**Figure S7.** The XPS survey spectra of SPC samples.



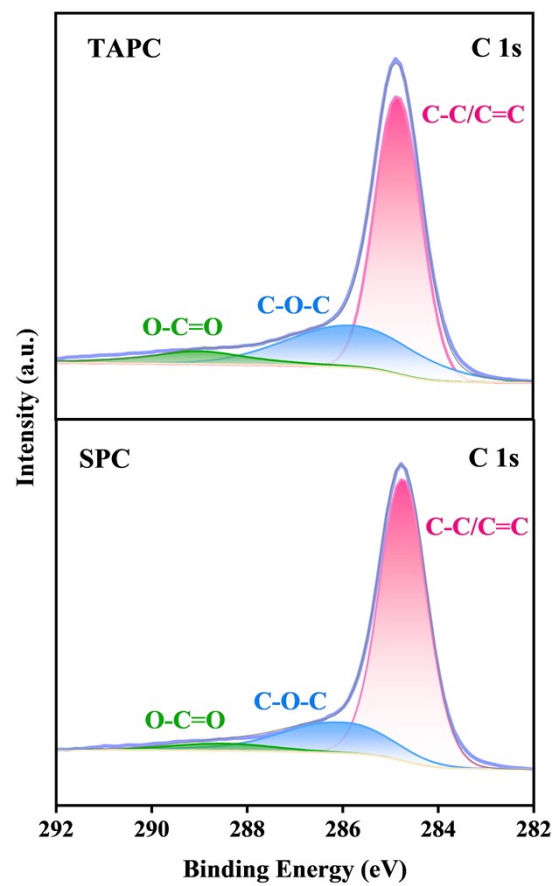

**Figure S8.** The high resolution XPS C 1s spectra of various samples.

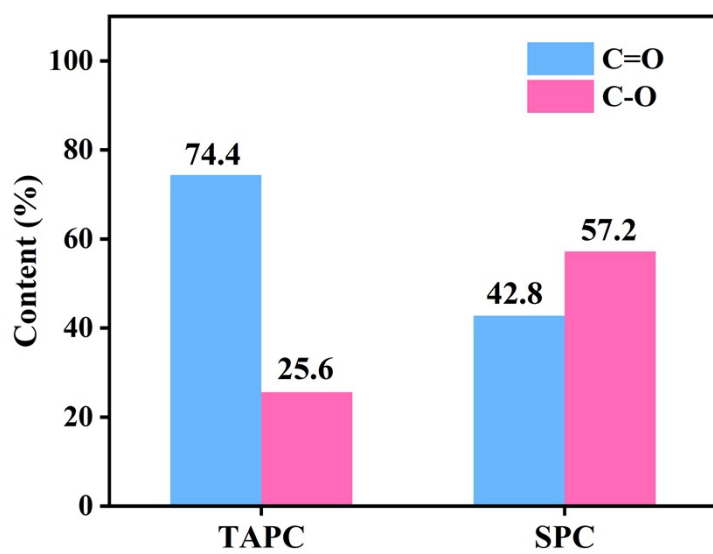

**Figure S9.** The content of C–O and C=O functional groups of various samples.

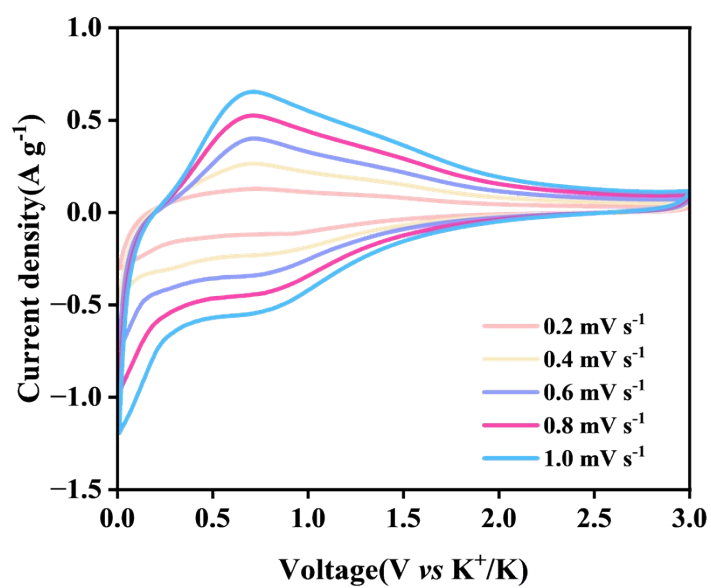

**Figure S10.** CV curves of SPC electrodes at different scanning rates.

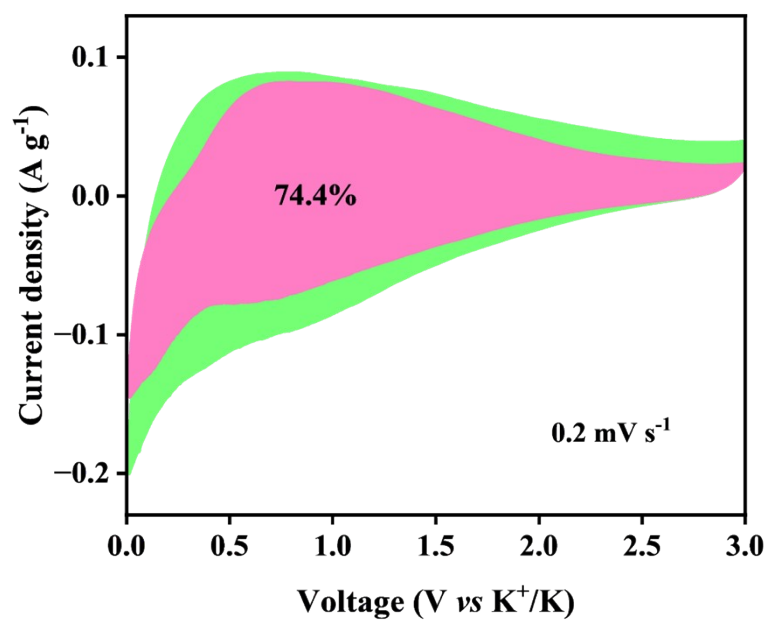

**Figure S11.** Contribution ratio of the capacitive-controlled and diffusion-controlled charge at  $0.2 \text{ mV s}^{-1}$  for TAPC anode.

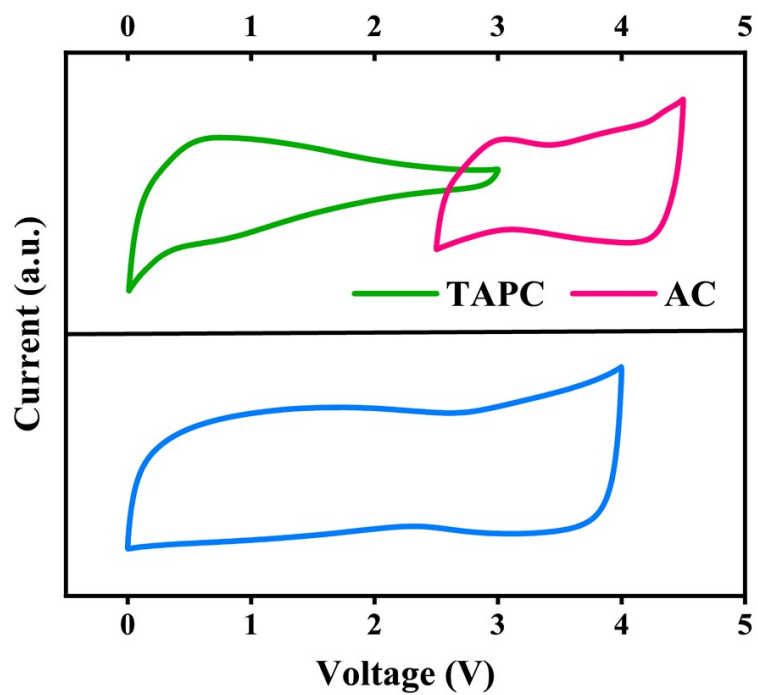

**Figure S12.** CV curves of TAPC and AC in K half-cell at a scan rate of 1 mV s<sup>-1</sup> (top), CV curves of TAPC//AC with a mass ratio of 1:1 (bottom).

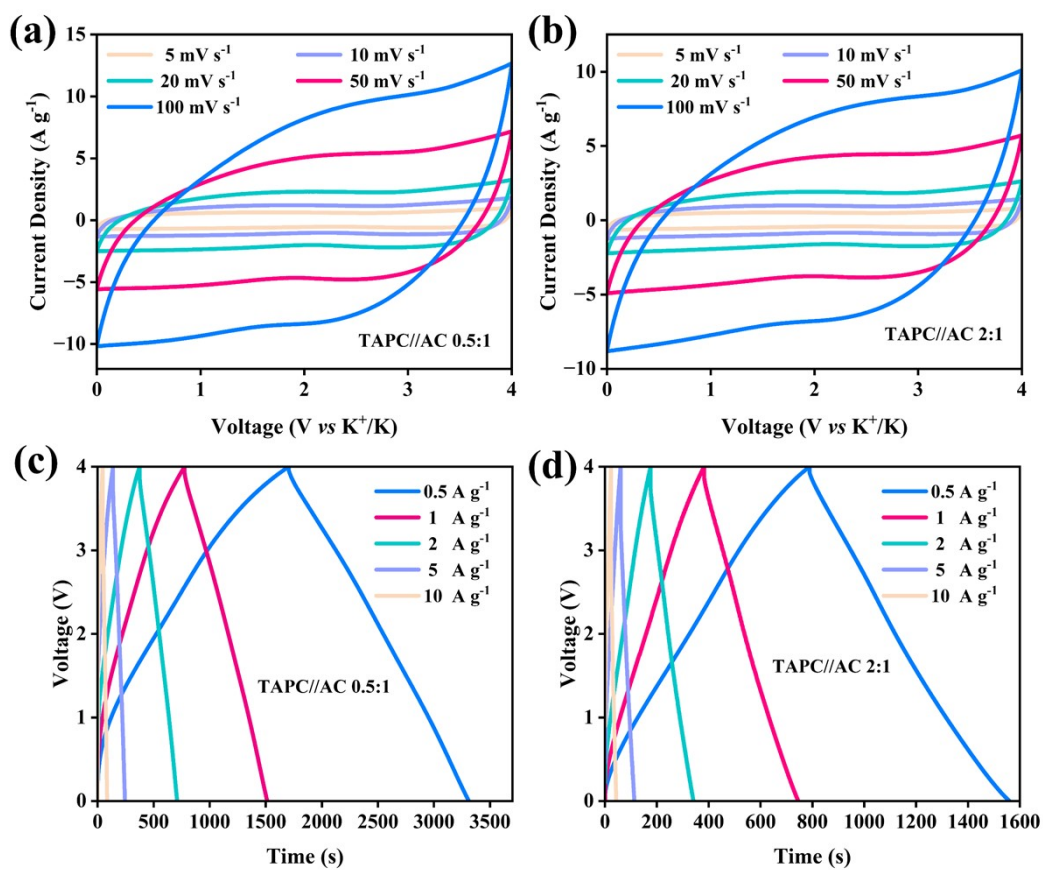

**Figure S13.** (a, b) CV curves at different scan rates. (c, d) Charge-discharge curves at different current densities of PIHCs with anode-to-cathode mass ratio of 0.5:1 and 2:1.

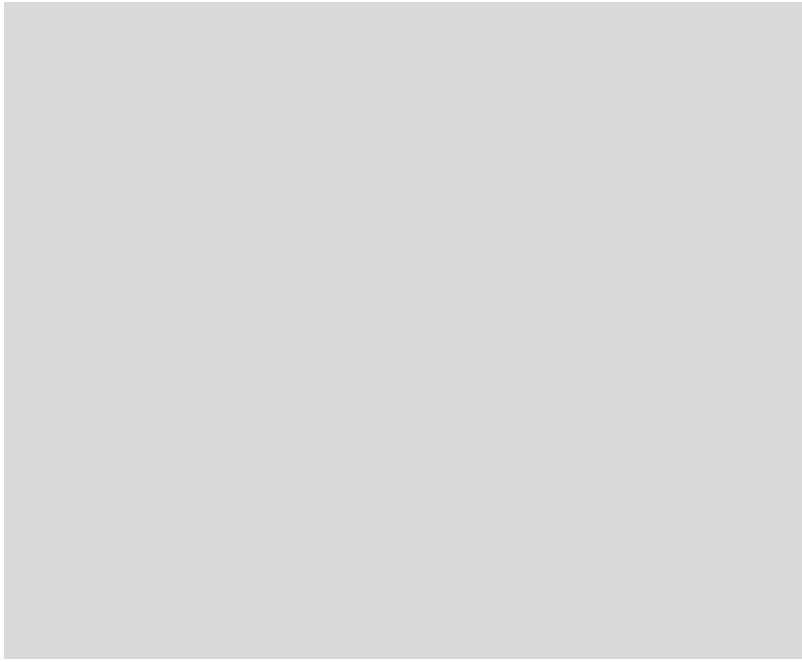

**Figure S14.** Ragne plots of PIHCs with various mass ratios.

**Table S1.** Composition of C and O element contents in various samples

| Samples | at% of total C 1s |       |       | at% of total O 1s |       |
|---------|-------------------|-------|-------|-------------------|-------|
|         | C-C//C=C          | C-O-C | O-C=O | C=O               | C-O   |
| TAPC    | 65%               | 27.6% | 7.4%  | 74.4%             | 25.6% |
| SPC     | 81%               | 15.7% | 3.3%  | 42.8%             | 57.2% |



**Table S2.** Specific surface area and pore volume of various samples

| samples | $S_{\text{BET}}$ ( $\text{m}^2 \text{g}^{-1}$ ) | $V_t$ ( $\text{cm}^3 \text{g}^{-1}$ ) | Pore vol (%) |         |        |
|---------|-------------------------------------------------|---------------------------------------|--------------|---------|--------|
|         |                                                 |                                       | 0.3~2 nm     | 2~50 nm | >50 nm |
| TAPC    | 436.3                                           | 0.33                                  | 55.45        | 18.37   | 26.17  |
| SPC     | 404.8                                           | 0.72                                  | 25.25        | 23.62   | 51.13  |

**Table S3.** Comparison of cycling performance between TAPC electrodes and other reported carbon-based anode materials for PIBs

| <b>Sample</b> | <b>Cyclability</b>                                             | <b>Ref.</b> |
|---------------|----------------------------------------------------------------|-------------|
| This work     | 244.5 mAh g <sup>-1</sup> , 3000 cycles, 2 A g <sup>-1</sup>   | Our work    |
| HG-CNTs       | 191.6 mAh g <sup>-1</sup> , 3000 cycles, 1 A g <sup>-1</sup>   | 1           |
| H-NOCBs       | 178.8 mAh g <sup>-1</sup> , 2500 cycles, 0.5 A g <sup>-1</sup> | 2           |
| P-MgO         | 178 mAh g <sup>-1</sup> , 2000 cycles, 1 A g <sup>-1</sup>     | 3           |
| MCS           | 113.9 mAh g <sup>-1</sup> , 3600 cycles, 1 A g <sup>-1</sup>   | 4           |
| SAPC          | 161.7 mAh g <sup>-1</sup> , 2000 cycles, 1 A g <sup>-1</sup>   | 5           |
| N-C           | 143 mAh g <sup>-1</sup> , 2000 cycles, 1 A g <sup>-1</sup>     | 6           |
| SHC           | 128.2 mAh g <sup>-1</sup> , 1500 cycles, 2 A g <sup>-1</sup>   | 7           |
| SNCCs         | 202.9 mAh g <sup>-1</sup> , 1000 cycles, 2 A g <sup>-1</sup>   | 8           |
| N/P-HPCSs     | 137.6 mAh g <sup>-1</sup> , 1500 cycles, 2 A g <sup>-1</sup>   | 9           |
| HDMC          | 195 mAh g <sup>-1</sup> , 3500 cycles, 1 A g <sup>-1</sup>     | 10          |
| PGCNTs        | 148.1 mAh g <sup>-1</sup> , 950 cycles, 0.2 A g <sup>-1</sup>  | 11          |
| OLSC          | 222 mAh g <sup>-1</sup> , 1600 cycles, 1 A g <sup>-1</sup>     | 12          |
| 3D-PNC@CNTs   | 143 mAh g <sup>-1</sup> , 500 cycles, 1 A g <sup>-1</sup>      | 13          |
| CCS           | 116.4 mAh g <sup>-1</sup> , 2700 cycles, 2 A g <sup>-1</sup>   | 14          |
| HCs           | 90.2 mAh g <sup>-1</sup> , 850 cycles, 1 A g <sup>-1</sup>     | 15          |
| NPO-C-800     | 106.8 mAh g <sup>-1</sup> , 600 cycles, 1 A g <sup>-1</sup>    | 16          |
| S-HMCNS       | 197 mAh g <sup>-1</sup> , 1400 cycles, 2 A g <sup>-1</sup>     | 17          |
| S-PC          | 204.8 mAh g <sup>-1</sup> , 3000 cycles, 1 A g <sup>-1</sup>   | 18          |

## Reference

1. H. Zhang, W. Li, J. Pan, Z. Sun, B. Xiao, W. Ye, C. Ke, H. Gao, Y. Cheng, Q. Zhang and M.-S. Wang, *Journal of Energy Chemistry*, 2022, **73**, 533-541.
2. J. Li, Y. Zheng, W. Chen, W. Zhu, Y. Zhu, H. Zhao, X. Bao, L. He and L. Zhang, *Journal of Materials Chemistry A*, 2022, **10**, 17827-17837.
3. H. Tan, X. Du, R. Zhou, Z. Hou and B. Zhang, *Carbon*, 2021, **176**, 383-389.
4. J. Zheng, Y. Wu, Y. Tong, X. Liu, Y. Sun, H. Li and L. Niu, *Nano-Micro Letters*, 2021, **13**, 174.
5. J. Du, S. Gao, P. Shi, J. Fan, Q. Xu and Y. Min, *Journal of Power Sources*, 2020, **451**, 227727.
6. J. Li, Y. Li, X. Ma, K. Zhang, J. Hu, C. Yang and M. Liu, *Chemical Engineering Journal*, 2020, **384**, 123328.
7. D. Qiu, B. Zhang, T. Zhang, T. Shen, Z. Zhao and Y. Hou, *ACS Nano*, 2022, **16**, 21443-21451.
8. G. Cheng, W. Zhang, W. Wang, H. Wang, Y. Wang, J. Shi, J. Chen, S. Liu, M. Huang and D. Mitlin, *Carbon Energy*, 2022, **4**, 986-1001.
9. S. Jin, P. Liang, Y. Jiang, H. Min, M. Niu, H. Yang, R. Zhang, J. Yan, X. Shen and J. Wang, *Chemical Engineering Journal*, 2022, **435**, 134821.
10. L. Xu, Z. Gong, C. Zhang, N. Li, Z. Tang and J. Du, *Journal of Alloys and Compounds*, 2023, **934**, 167820.
11. J. Chen, G. Chen, S. Zhao, J. Feng, R. Wang, I. P. Parkin and G. He, *Small*, 2023, **19**, 2206588.
12. W. Tan, L. Wang, K. Liu, Z. Lu, F. Yang, G. Luo and Z. Xu, *Small*, 2022, **18**, 2203494.
13. P. Chen, Y. Li, X. Cheng, H. Yu, X. Yin, Y. Jiang, H. Zhang, S. Li and F. Huang, *Journal of Power Sources*, 2023, **574**, 233164.
14. Y. Chen, X. Shi, B. Lu and J. Zhou, *Advanced Energy Materials*, 2022, **12**, 2202851.
15. Z. Liu, S. Wu, Y. Song, T. Yang, Z. Ma, X. Tian and Z. Liu, *ACS Appl Mater*

*Interfaces*, 2022, **14**, 47674-47684.

16. H. Ou, J. Huang, Y. Zhou, J. Zhu, G. Fang, X. Cao, J. Li and S. Liang, *Chemical Engineering Journal*, 2022, **450**, 138444.

17. W. Liu, H. Zhang, W. Ye, B. Xiao, Z. Sun, Y. Cheng and M.-S. Wang, *Small*, 2023, **19**, 2300605.

18. Z. Bo, P. Chen, F. Tian, Y. Huang, Z. Zheng, J. Yan, K. Cen, H. Yang and K. Ostrikov, *Carbon*, 2023, **213**, 118261.
